# Supplementary material for: Mixed-lineage kinase 3 pharmacological inhibition attenuates murine nonalcoholic steatohepatitis
Source: JCI journal article supplement (doi:10.1172/jci.insight.94488), 2017-08-02
Supplement: sd1 [file 1]

Supplemental Table 1: Reduction of expression of genes involved in inflammation

| Gene   | <i>MLK3</i> <sup>-/-</sup> * (% of WT FFC-fed mice) | URMC099 (% of vehicle-treated, FFC-fed mice) | p value |
|--------|-----------------------------------------------------|----------------------------------------------|---------|
| CXCL10 | 39.4 ± 6.8, n=5                                     | 58.9 ± 7.8, n=4                              | ns      |
| TNF-α  | 68.4 ± 3.7, n=6                                     | 50.1 ± 7.2, n=4                              | p<0.05  |
| F4/80  | 62.3 ± 3.4, n=6                                     | 54.7 ± 7.6, n=5                              | ns      |
| MCP-1  | 74.0 ± 6.7, n=6                                     | 52.4 ± 7.4, n=4                              | ns      |
| CD68   | 41.4 ± 3.0, n=6                                     | 33.7 ± 5.1, n=4                              | ns      |

\* Data from Ibrahim et al. Liver Int. 2014 (reference 22), and Hepatology 2016 (reference 23), ns (non-significant). Percent of reduction in the expression of key genes involved in hepatic inflammation in *MLK3*<sup>-/-</sup> mice on an obesity-inducing diet vs URMC099-treated, wild type mice on an obesity-inducing diet compared to untreated WT mice on an obesity inducing-diet.
